# Supplementary material for: Capture of Pb2+ and Cu2+ Metal Cations by Neisseria meningitidis-type Capsular Polysaccharides
Source: PubMed Central journal article supplement (PMC6023028; doi:10.3390/biom8020023), 2018-05-05
Supplement: biomolecules-08-00023-s001.pdf [file biomolecules-08-00023-s001.pdf]

A)

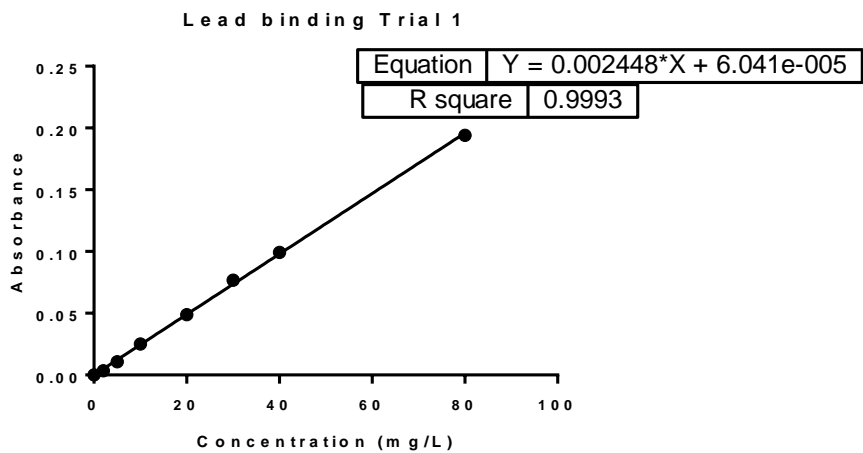

B)

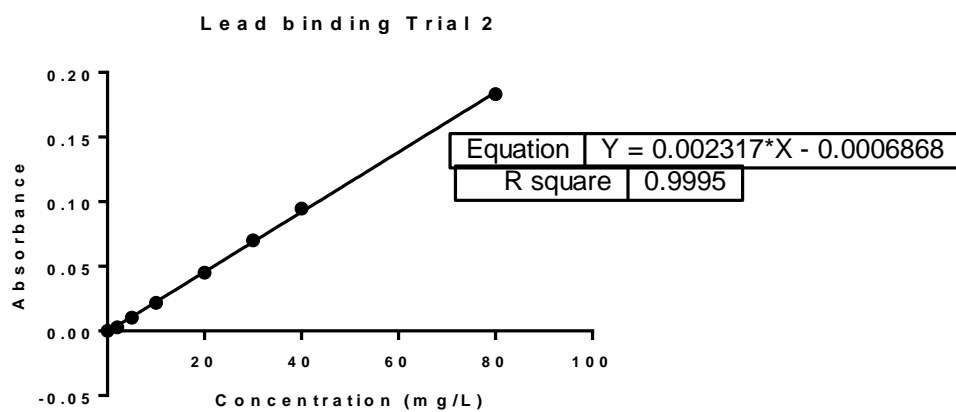

Fig. S1 Calibration curves for  $Pb^{2+}$  binding to colominic acid in A) Trial 1 and B) Trial 2. These linear regression curves to determine calculated concentrations during metal binding experiments

A)

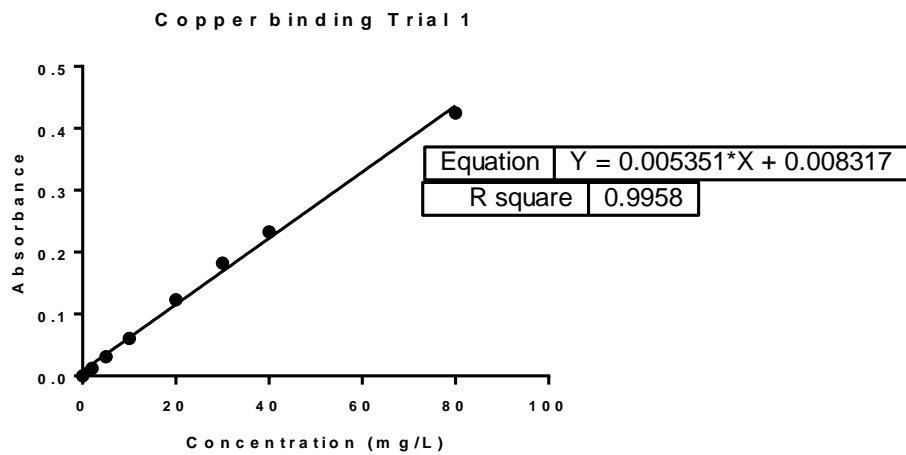

B)

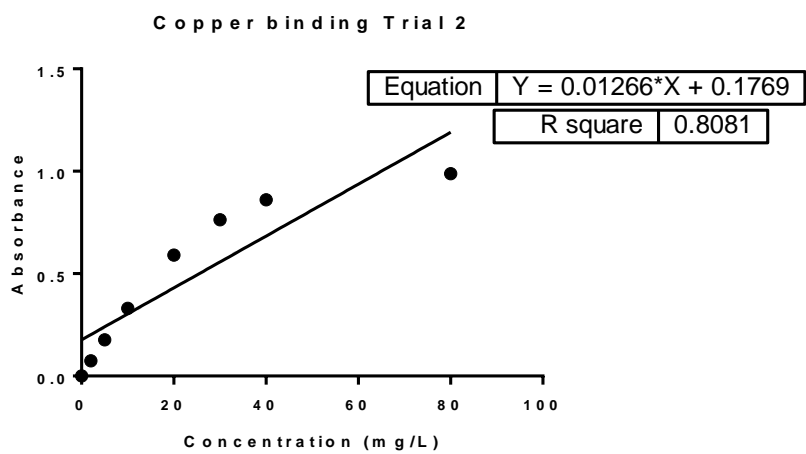

Fig. S2 Calibration curves for  $\text{Cu}^{2+}$  binding to colominic acid in A) Trial 1 and B) Trial 2. These linear regression curves to determine calculated concentrations during metal binding experiments

Copy of Copper binding Trial 2

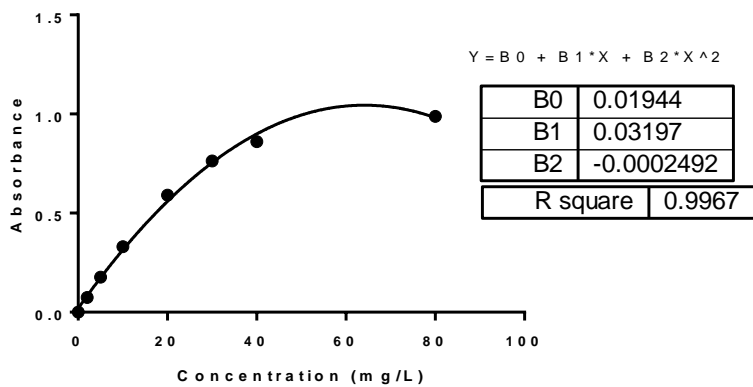

Fig. S3 Second order polynomial fit to Trial 2 standard curve data.

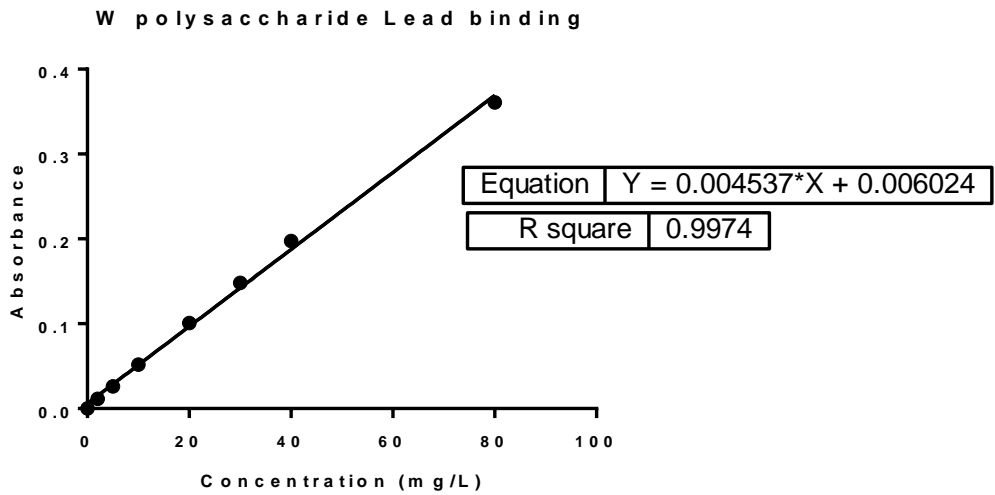

Fig. S4 Calibration curves for  $Pb^{2+}$  binding to serogroup W polysaccharide. The linear regression curves to determine calculated concentrations during metal binding experiments
